# Supplementary material
Source: MDPI journal article supplement (https://www.mdpi.com/2076-3417/5/3/415)
Supplement: s1 [file s1]

## Supplementary Materials

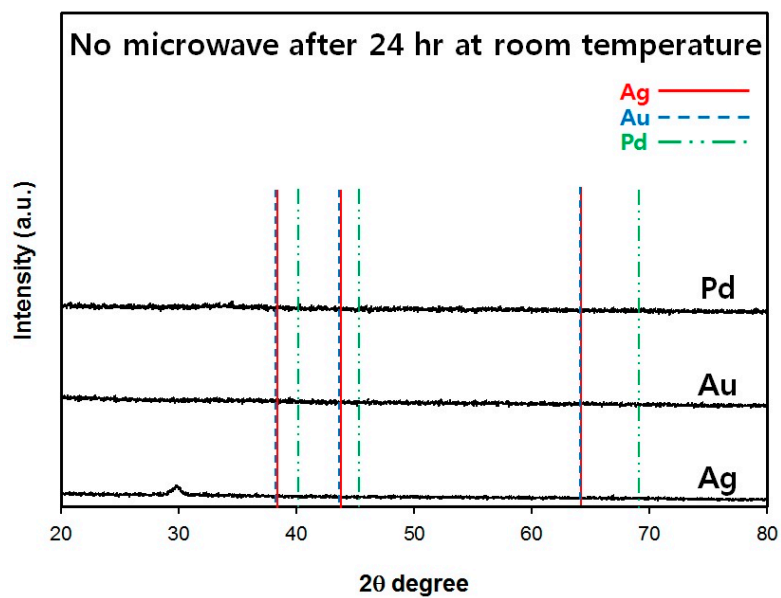

**Figure S1.** XRD patterns of synthesized Ag, Au, and Pd samples at room temperature without microwave irradiation. It shows no metal particles formation without microwave irradiation.
